# Supplementary material for: A CYC–RAD–DIV–DRIF interaction likely pre-dates the origin of floral monosymmetry in Lamiales
Source: PubMed Central journal article supplement (PMC8801154; doi:10.1186/s13227-021-00187-w), 2022-01-29
Supplement: 13227_2021_187_MOESM10_ESM.pdf [file 13227_2021_187_MOESM10_ESM.pdf]

**Additional file 10 Fig. S1–S12.** Expression the orthologs of *AmCYC*, *AmRAD*, *AmDIV*, *AmDRIF1/2*, *SIMYBI* (*SIDIVlike5*), and *SIFSBI* (*SIDRIF5*) in *Vitis vinifera*. Images are from bar.utoronto.ca. Some genes are represented by multiple transcripts.

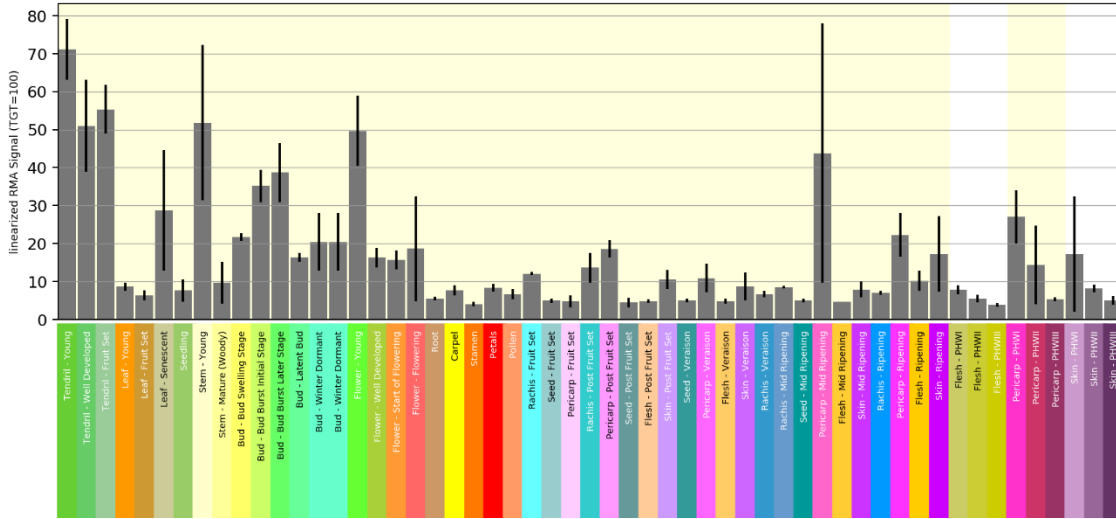

**Additional file 10 Figure S1.** Expression of the *AmCYC* ortholog *Vitis vinifera* *GSVIVT01036449001* represented by transcript VIT\_14s0083g00150.

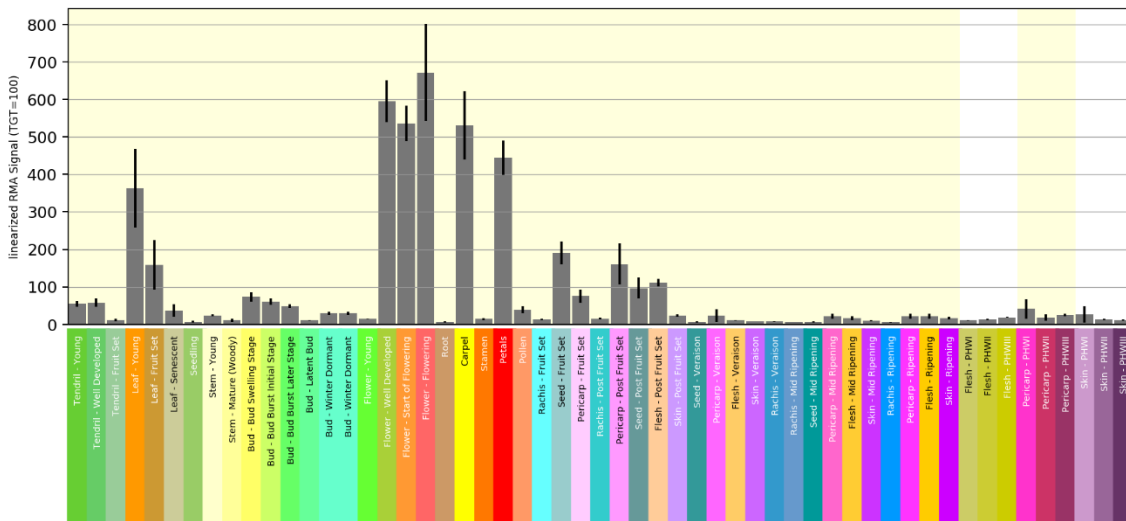

**Additional file 10 Figure S2.** Expression of the *AmRAD* ortholog *Vitis vinifera* *GSVIVT01031975001* represented by transcript VIT\_03s0063g02620.

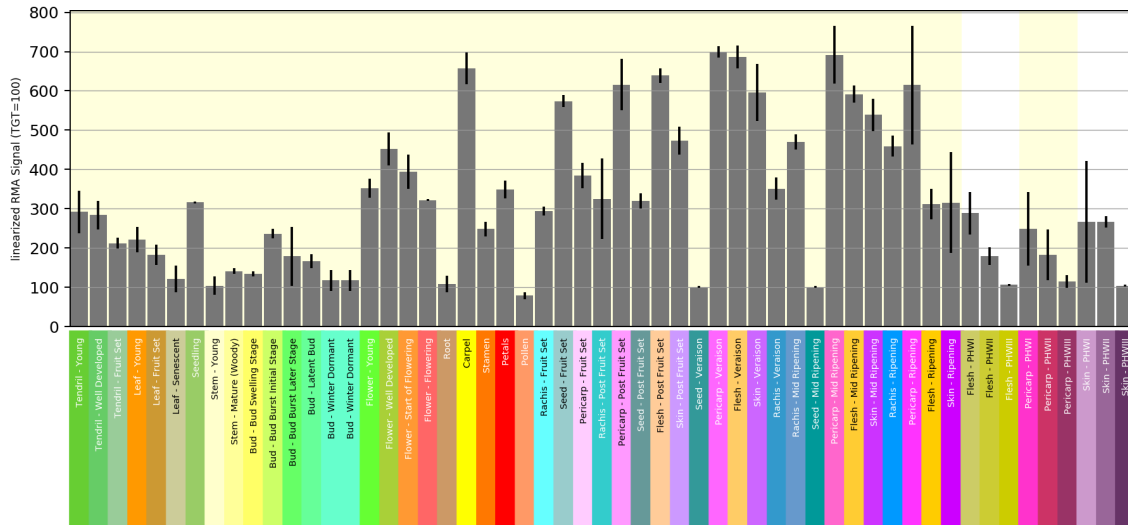

**Additional file 10 Figure S3.** Expression of the *AmDIV* ortholog *Vitis vinifera DIVlike8* represented by transcript VIT\_06s0004g06100.

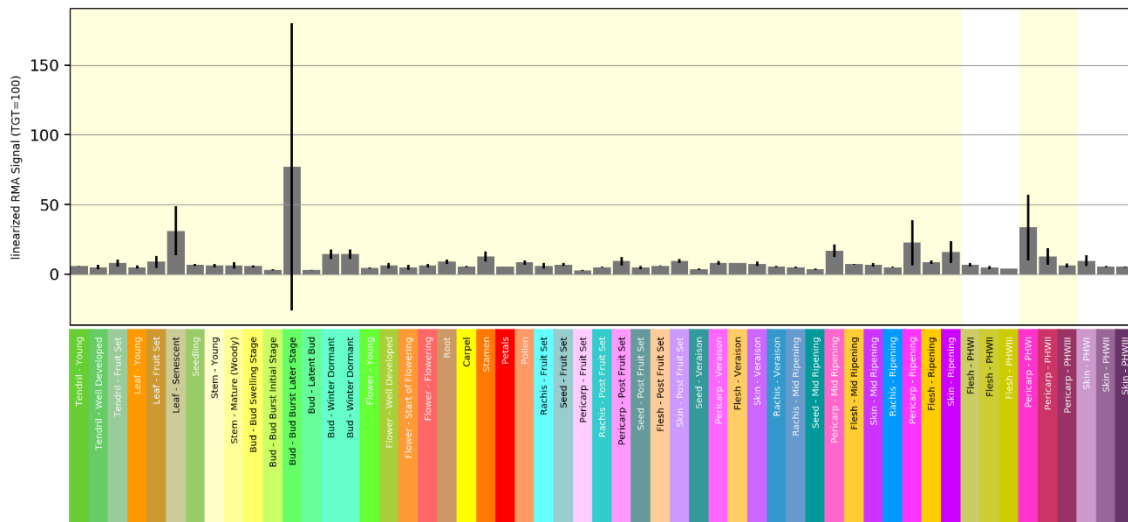

**Additional file 10 Figure S4.** Expression of the *SIDIVlike5* ortholog/close paralog *Vitis vinifera DIVlike12* represented by transcript VIT\_18s0001g02210.



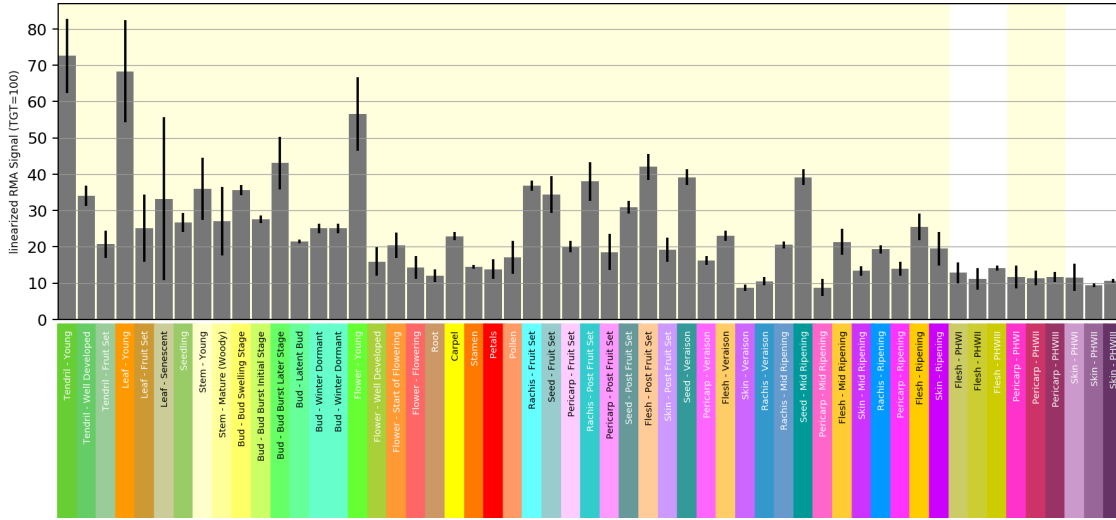

Additional file 10 Figure S7. Expression of the *AmDRIF1* ortholog *Vitis vinifera DRIFlike2* represented by VIT\_00s0174g00180 (has multiple transcripts in the expression browser).

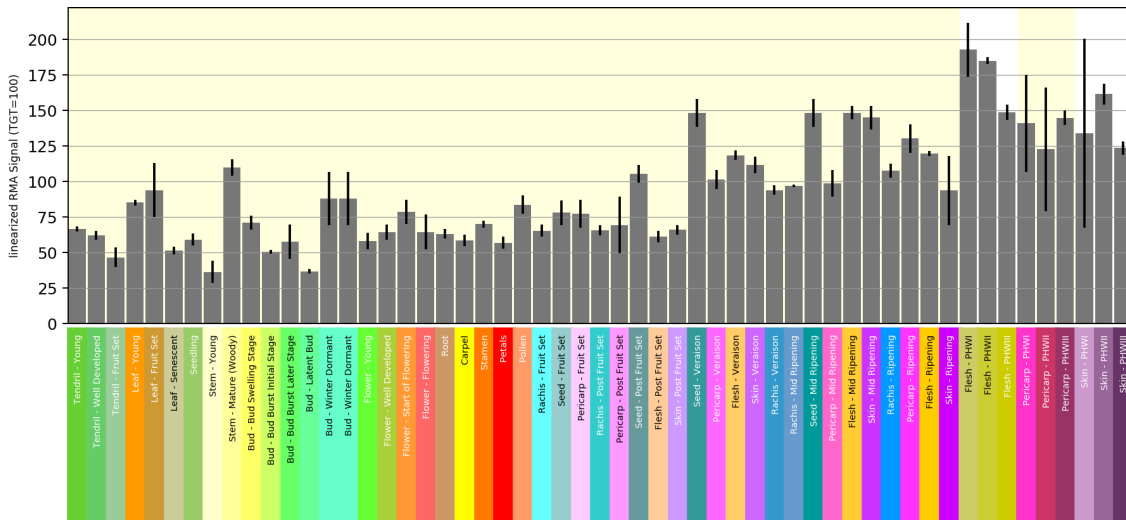

Additional file 10 Figure S8. Expression of the *AmDRIF2* ortholog *Vitis vinifera DRIFlike1* represented by transcript VIT\_00s0226g00040.



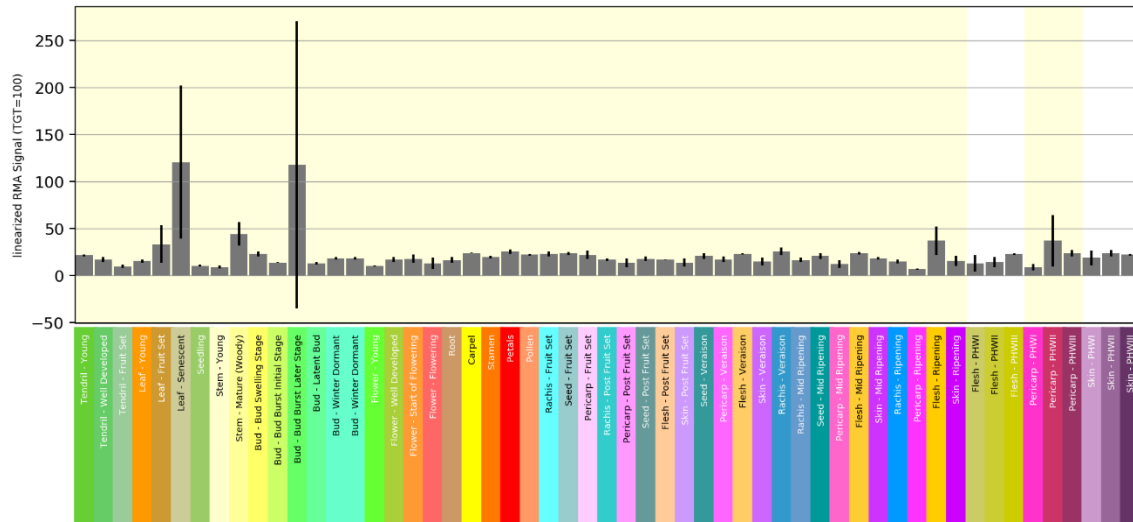

**Additional file 10 Figure S11.** Expression of the *AmDRIF2* ortholog *Vitis vinifera DRIFlike3* represented by transcript VIT\_00s0226g00150 (has multiple transcripts in the expression browser).

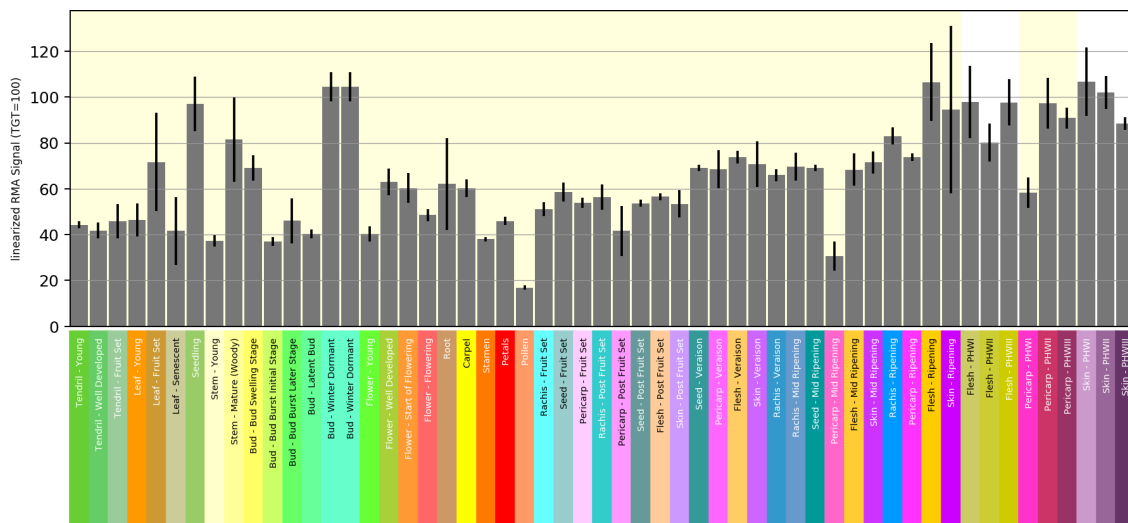

**Additional file 10 Figure S12.** Expression of the *SIFSB1* ortholog *Vitis vinifera DRIFlike4* represented by transcript VIT\_01s0010g01590.
