# Supplementary material for: A CYC–RAD–DIV–DRIF interaction likely pre-dates the origin of floral monosymmetry in Lamiales
Source: PubMed Central journal article supplement (PMC8801154; doi:10.1186/s13227-021-00187-w), 2022-01-29
Supplement: 13227_2021_187_MOESM11_ESM.pdf [file 13227_2021_187_MOESM11_ESM.pdf]

**Additional file 11 Fig. S1–S14.** Expression the orthologs of *AmCYC*, *AmRAD*, *AmDIV*, *AmDRIF1/2*, *SIMYBI* (*SIDIVlike5*), and *SIFSB1* (*SIDRIF5*) in *Oryza sativa*. Images are from bar.utoronto.ca. Expression data for one of the *AmRAD* orthologs Os05g50350 was not available.

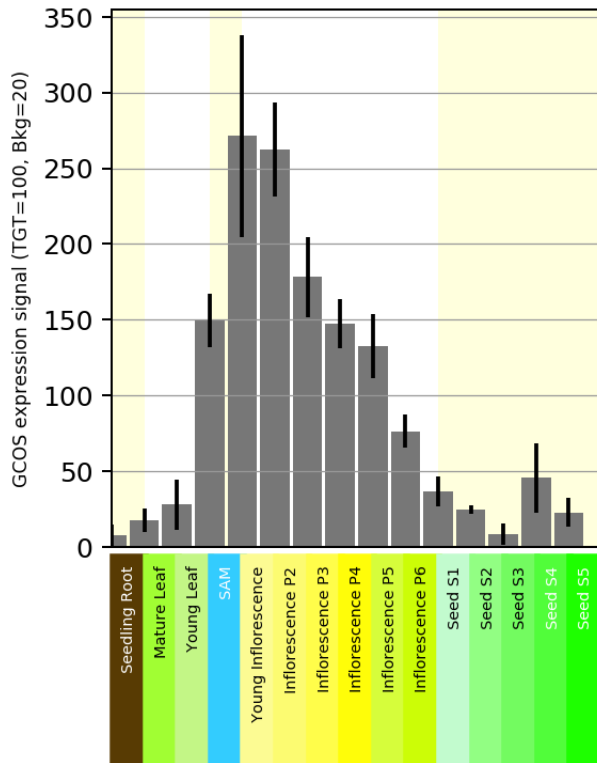

**Additional file 11 Figure S1.** Expression of the *AmCYC* ortholog of *Oryza sativa* Os03g49880.

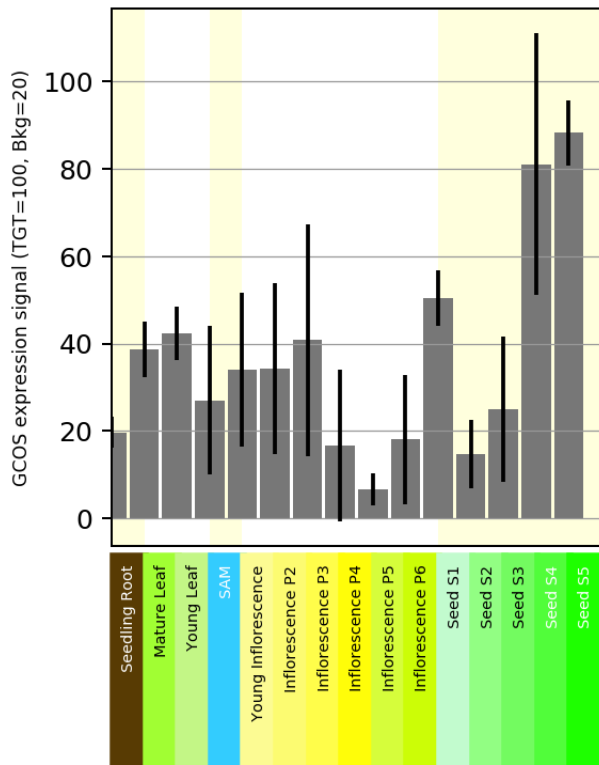

**Additional file 11 Figure S2.** Expression of the *AmRAD* ortholog of *Oryza sativa* Os12g33950.

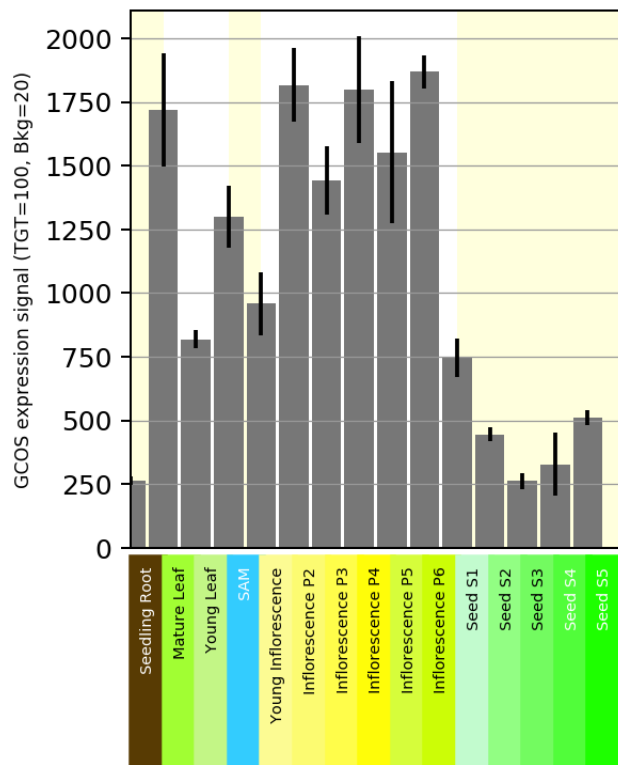

**Additional file 11 Figure S3.** Expression of the *AmRAD* ortholog of *Oryza sativa* Os02g47744.

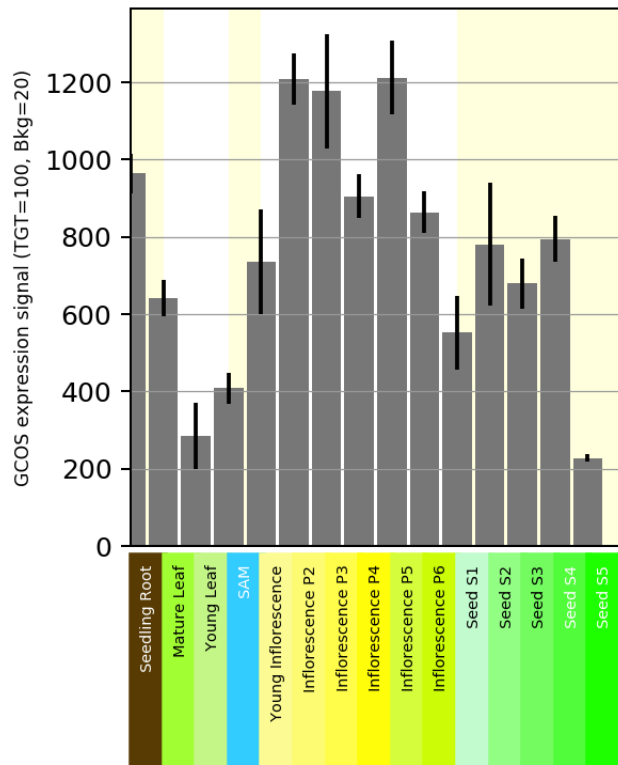

**Additional file 11 Figure S4.** Expression of the *AmDIV* ortholog *Oryza sativa DIV-like3* (Os01g63460).

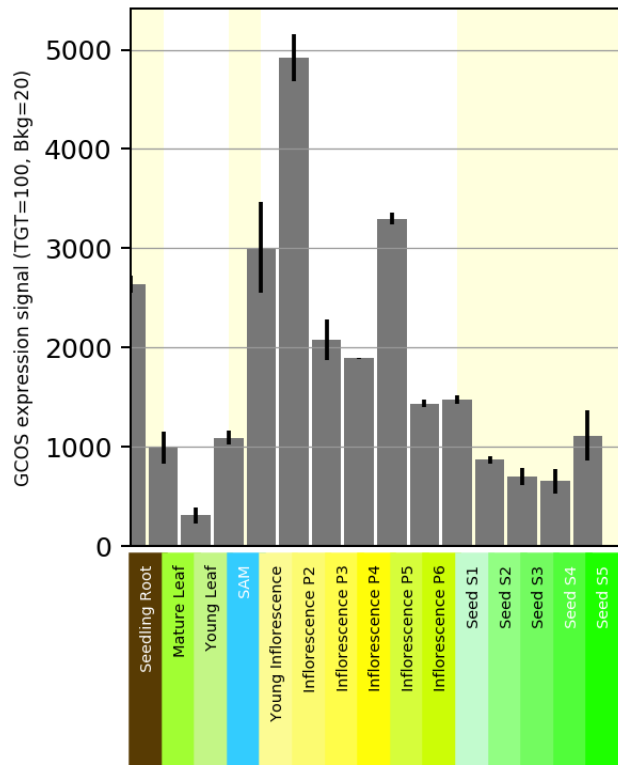

**Additional file 11 Figure S5.** Expression of the *AmDIV* ortholog *Oryza sativa DIV-like4* (Os05g37730).

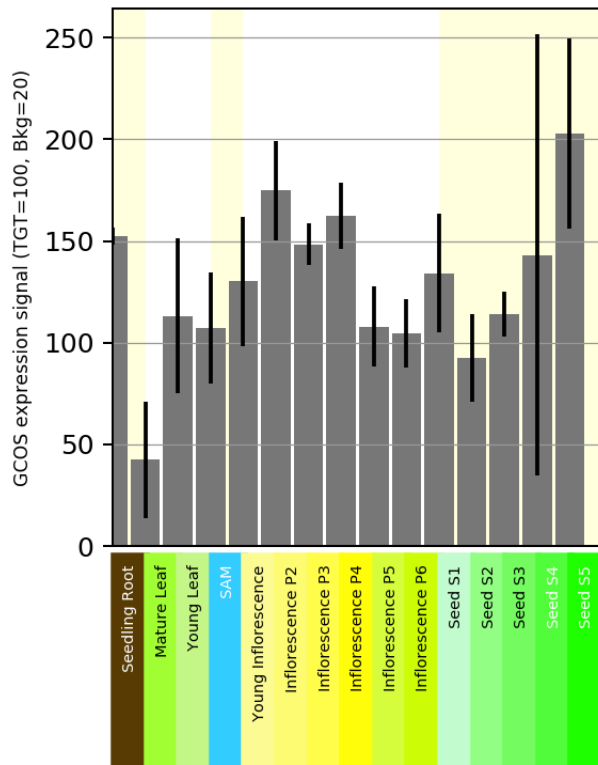

**Additional file 11 Figure S6.** Expression of the *AmDIV* ortholog *Oryza sativa DIV-like5* (Os01g04930).

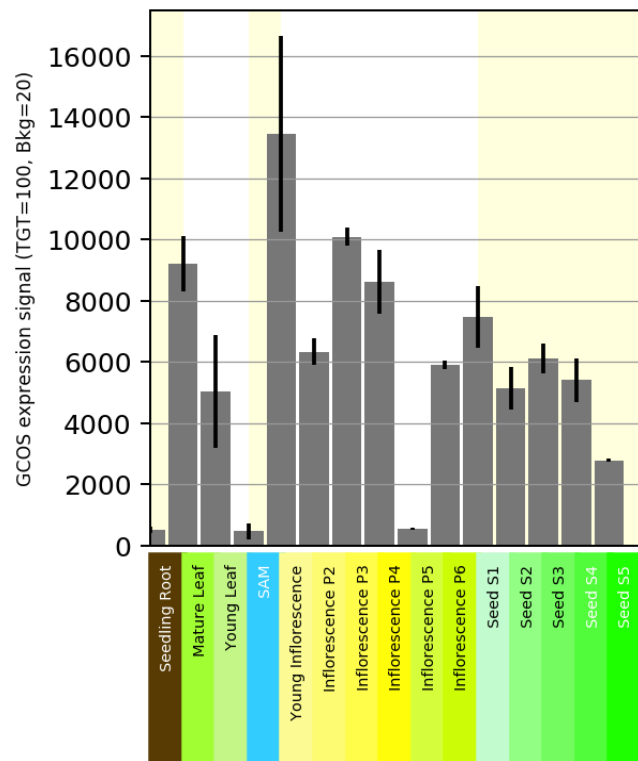

**Additional file 11 Figure S7.** Expression of the *SIDIVlike5* (*SIMYBI*) ortholog/close paralog *Oryza sativa DIV-like1* (Os01g64360).

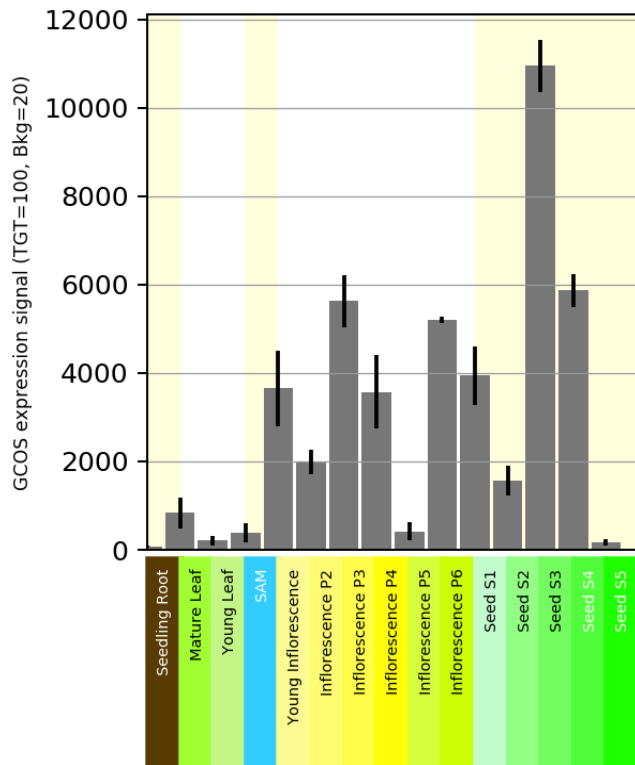

**Additional file 11 Figure S8.** Expression of the *SIDIVlike5* (*SIMYBI*) ortholog/close paralog *Oryza sativa* *DIV-like2* (Os05g37060).



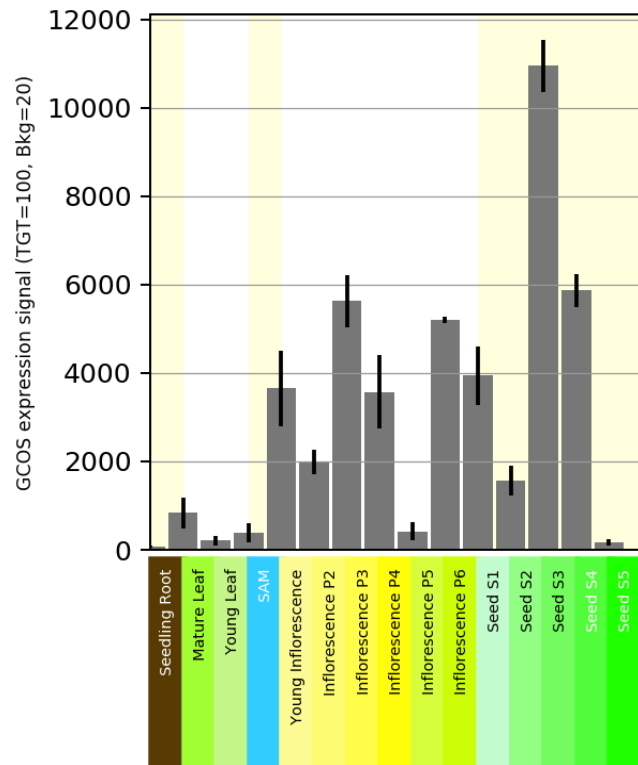

**Additional file 11 Figure S9.** Expression of the *AmDRIF1/2* ortholog *Oryza sativa DRIFlike1* (Os04g41830).

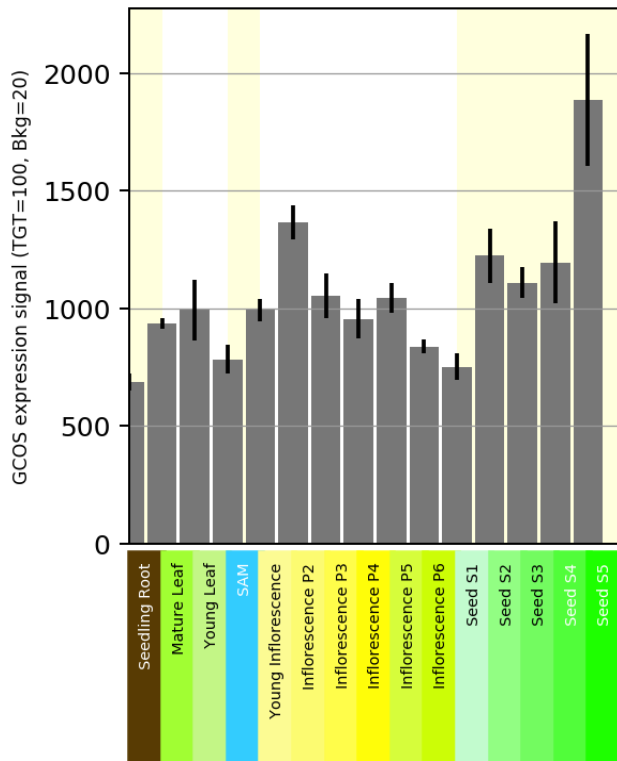

**Additional file 11 Figure S10.** Expression of the *AmDRIF1/2* ortholog *Oryza sativa DRIFlike2* (Os05g24000).

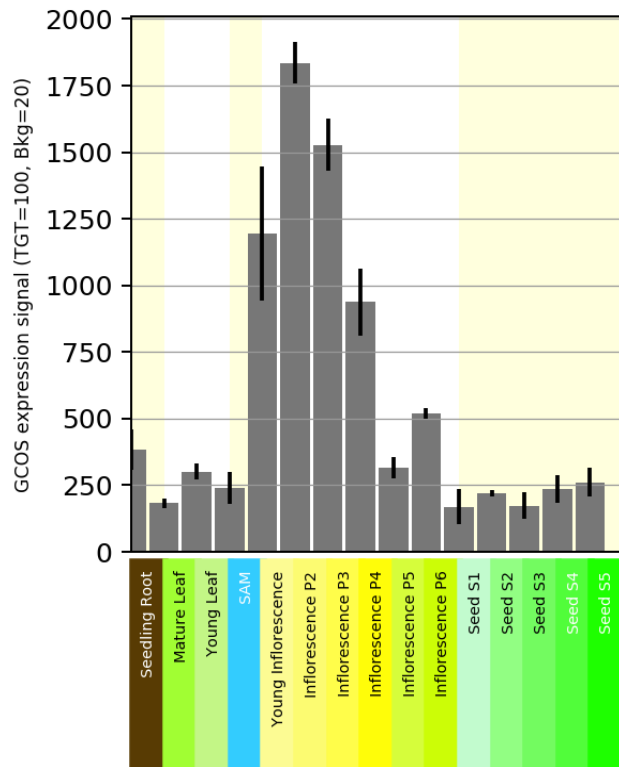

**Additional file 11 Figure S11.** Expression of the *SIDRIF5* (*SIFSB1*) ortholog *Oryza sativa* *DRIFlike3* (Os02g42020).

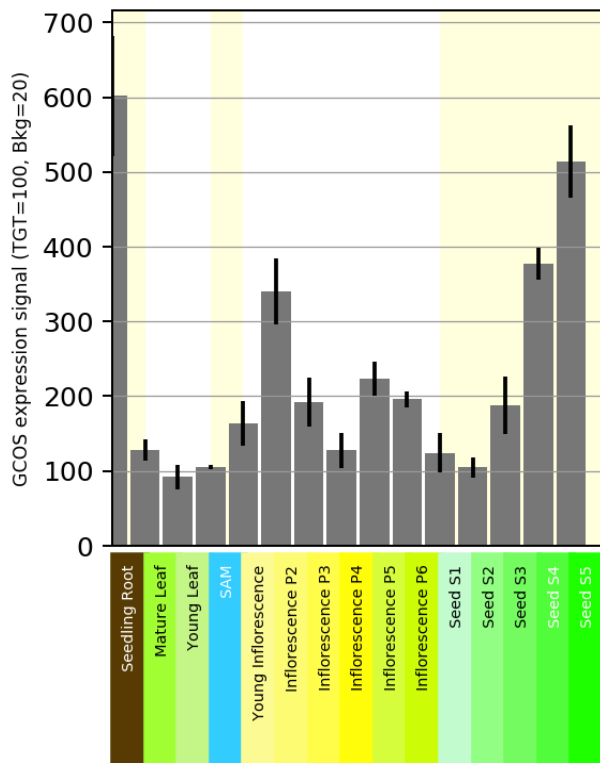

**Additional file 11 Figure S12.** Expression of the *SIDRIF5* (*SIFSB1*) ortholog *Oryza sativa* *DRIFlike4* (Os04g44210).

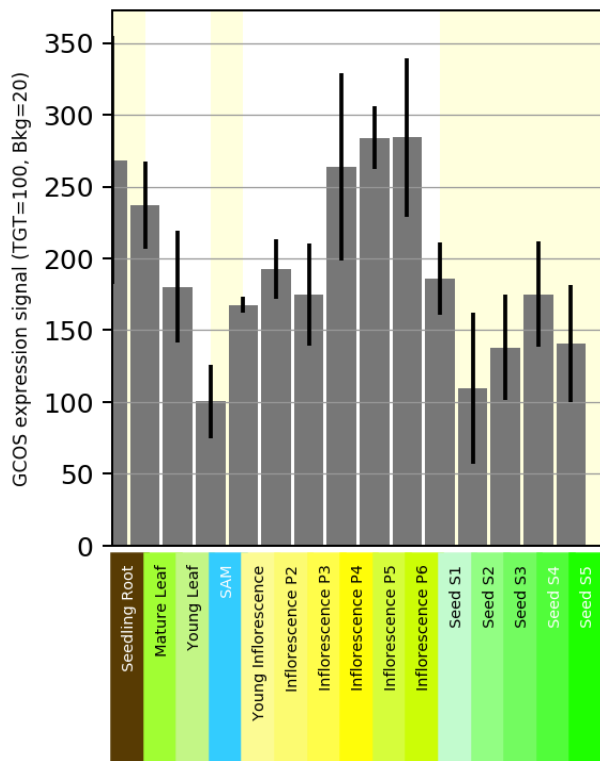

**Additional file 11 Figure S13.** Expression of the *SIDRIF5* (*SIFSB1*) ortholog *Oryza sativa* *DRIFlike5* (Os04g57700).

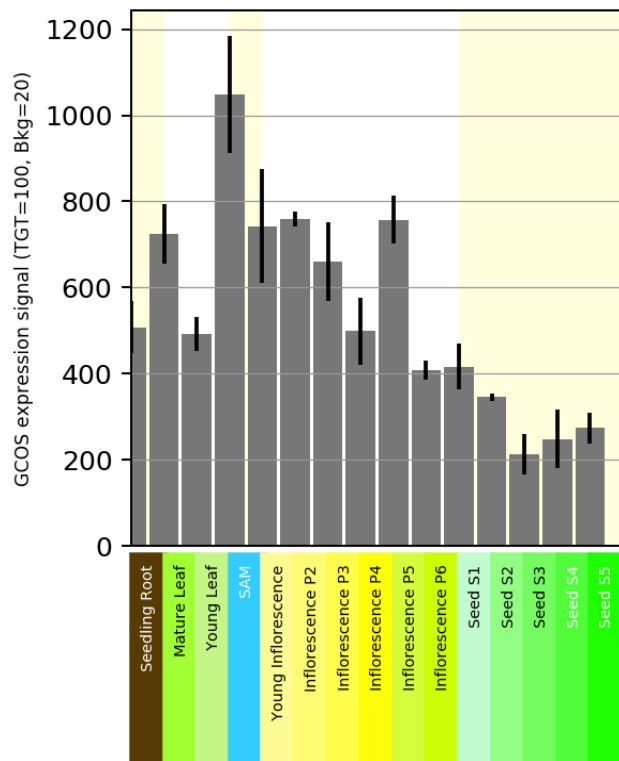

**Additional file 11 Figure S14.** Expression of the *SIDRIF5* (*SIFSB1*) ortholog *Oryza sativa* *DRIFlike6* (Os08g01080).
